RESEARCH ARTICLE

# Granulocyte colony stimulating factor therapy for stroke: A pairwise meta-analysis of randomized controlled trial

Xin Huang<sup>☉</sup>, Yu Liu<sup>☉\*</sup>, Shuang Bai, Lidan Peng, Boai Zhang, Hong Lu

Department of Neurology, The First Affiliated Hospital of Zhengzhou University, Henan, China

☉ These authors contributed equally to this work.

\* [martinsums@sina.com](mailto:martinsums@sina.com)

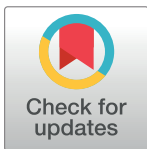

## Abstract

Granulocyte colony-stimulating factor (G-CSF) is a therapeutic candidate for stroke that has demonstrated anti-inflammatory and neuroprotective properties. Data from preclinical and clinical studies have suggested the safety and efficacy of G-CSF in stroke; however, the exact effects and utility of this cytokine in patients remain disputed. We performed a meta-analysis of randomized controlled trials of G-CSF in ischemic and hemorrhagic stroke to assess its clinical safety and efficacy. Electronic databases were searched for relevant publications in English and Chinese. A total of 14 trials met the inclusion criteria. G-CSF (cumulative dose range, 1–135 μg/kg/day) was tested against placebo in a total of 1037 participants. There was no difference in the rate of mortality between groups (odds ratio, 1.23; 95% confidence interval, 0.76–1.97,  $p = 0.40$ ). Moreover, the rate of serious adverse events did not differ between groups and provided evidence for the safety of G-CSF administration in stroke patients (odds ratio, 1.11; 95% confidence interval, 0.77–1.61,  $p = 0.57$ ). No significant outcome benefits were noted with respect to the National Institutes of Health Stroke Scale (mean difference, -0.16; 95% confidence interval, -1.02–0.70,  $p = 0.72$ ); however, improvements were noted with respect to the Barthel Index (mean difference, 8.65; 95% confidence interval 0.98–16.32;  $p = 0.03$ ). In conclusion, it appears to be safe in administration of G-CSF, but it will increase leukocyte count. G-CSF was a weakly significant benefit with improving the BI scores, while there was no improvement in the NIHSS scores. Larger and more robustly designed trials of G-CSF in stroke are needed to confirm the results.

## OPEN ACCESS

**Citation:** Huang X, Liu Y, Bai S, Peng L, Zhang B, Lu H (2017) Granulocyte colony stimulating factor therapy for stroke: A pairwise meta-analysis of randomized controlled trial. PLoS ONE 12(4): e0175774. <https://doi.org/10.1371/journal.pone.0175774>

**Editor:** Robert K Hills, Cardiff University, UNITED KINGDOM

**Received:** July 28, 2016

**Accepted:** March 22, 2017

**Published:** April 13, 2017

**Copyright:** © 2017 Huang et al. This is an open access article distributed under the terms of the [Creative Commons Attribution License](https://creativecommons.org/licenses/by/4.0/), which permits unrestricted use, distribution, and reproduction in any medium, provided the original author and source are credited.

**Data Availability Statement:** All files are available from the PubMed, Embase, Cochrane Library, Chinese Wanfang database or SinoMed.

**Funding:** This work was supported only by the Creative Talent Project supported by Henan Province Health Department, Grant number: 2010-4160, URL: <http://www.hnwsf.gov.cn>, Recipient: YL. And this funder had no role in study design, data collection and analysis, decision to publish, or preparation of the manuscript.

## Introduction

Stroke is a major cause of death and disability around the world that affects millions of patients every year. Additionally, the number of patients suffering from stroke is growing due to increasing aging populations. Thrombolysis is one of the few effective treatments for stroke; however, a narrow therapeutic window has limited its application in clinical practice. Other conventional pharmacotherapies for stroke including fibrinolytic, anticoagulant, and anti-platelet agents also have inadequate efficacy. Furthermore, while surgical treatments such as

**Competing interests:** The authors have declared that no competing interests exist.

hemicraniectomy have been shown to increase the probability of survival among patients with malignant middle-cerebral-artery infarction, surgery carries the risk of producing substantial disability [1]. Therefore, better methods for the protection and recovery of damaged brain tissues after an established cerebral infarction are required.

Granulocyte colony-stimulating factor (G-CSF) is a 20-kDa glycoprotein that belongs to the cytokine family of growth factors and functions to promote the production, mobilization, and differentiation of hematopoietic stem cells [2, 3]. G-CSF therapies including filgrastim, lenograstim, and pegfilgrastim have been approved for clinical use and utilized around the world for more than 20 years. G-CSF is widely used to promote the proliferation of granulocytes or APCs, for the treatment of congenital or acquired neutropenia, and for the mobilization of transplanted stem cells in patients with hematologic malignancies [4]. In addition to the functions of G-CSF in the hematopoietic system, recent trials have indicated that G-CSF may also play an important role in the central nervous system (CNS). Specifically, studies have suggested that G-CSF therapy can produce beneficial effects in stroke and improve neurological outcomes [5, 6]. In the CNS, G-CSF is thought to exert neuroprotective effects via the inhibition of apoptosis and inflammation [7] as well as by stimulating angiogenesis [8] and neurogenesis [9]. Indeed, an increasing number of patent applications are related to the development of G-CSF for the treatment of neurological disorders. Yet, the results of clinical trials of G-CSF agents in stroke are conflicting. Fan [10] had performed a meta-analysis that showed the improvement of functional outcomes in stroke patients treated with G-CSF in 2014. Their results were different to another review [11] performed by Bath in 2012. In the latest years, there had several new trials performed. To clarify the utility of G-CSF therapy after stroke, we conducted a meta-analysis of relevant clinical articles with the aim of informing the clinical efficacy of G-CSF in stroke and guiding future clinical studies.

## Materials and methods

### Search strategy

We conducted a search of the PubMed, Embase, Cochrane Library, Chinese Wanfang databases and SinoMed for relevant articles published between June of 1960 and February of 2016. Search terms included “stroke” or “cerebrovascular accident” and “G-CSF” or “granulocyte colony-stimulating factor.” Only articles published in English or Chinese were included. Additionally, a manual search was conducted on the bibliographies of relevant articles to identify eligible studies not referenced in the aforementioned databases.

### Selection of studies and data extraction

We only included original parallel-design randomized controlled trial studies that compared G-CSF therapy to placebo or no intervention in patients with acute or subacute ischemic or hemorrhagic stroke. All included trials reported mortality or severe adverse events (SAEs) as primary outcomes, and secondary outcomes in inclusion criteria included the National Institutes of Health Stroke Scale (NIHSS, a stroke severity scale) or Barthel Index (BI, scale for the activities of daily living and motor function assessment). Included trials also reported laboratory parameters for leukocyte counts. Studies were excluded if subjects did not meet the criteria for stroke as defined by the World Health Organization or if patients suffered from other major medical comorbidities (e.g., heart disease).

Each study was examined by 2 independent investigators in a 2-stage process as follows: first, titles and abstracts underwent initial screening; subsequently, the full-text articles were assessed for eligibility. Disagreements regarding inclusion were resolved through discussion with a third investigator. Dichotomous and continuous outcome measure data were extracted

into data extraction tables by 2 independent investigators. Disagreements regarding the data were resolved through discussion with a third investigator. Trial authors were contacted for additional information when data reporting was insufficient or missing in original articles. Review Manager software version 5.3 was used for the analysis.

### Assessment of risk of bias

Risk of bias was assessed using the Cochrane Collaboration tool for assessment of risk of bias with the following items: (1) random sequence generation; (2) allocation concealment; (3) blinding of participants and personnel; (4) blinding of outcome assessment; (5) incomplete outcome data; (6) selective reporting; (7) other bias. Risk of bias was assigned as low, unclear, or high. Reporting bias was not assessed using funnel plots since the number of included trials was small.

### Assessment of heterogeneity

We tested for heterogeneity among studies using Q and  $I^2$  statistics. Heterogeneity was considered to be significant if the  $p$ -value of a given Q statistic was  $< 0.10$ . For  $I^2$  statistics, we classified heterogeneity as follows:  $I^2 < 40\%$  was classified as minimal;  $I^2 = 40\text{--}75\%$  was classified as modest; and  $I^2 > 75\%$  was classified as substantial [12]. Positive heterogeneity results were confirmed using a sensitivity analysis. For data synthesis, if statistical heterogeneity existed ( $p < 0.10$  or  $I^2 > 50\%$ ), we reported a random-effects model; if statistical heterogeneity did not exist ( $p > 0.10$  or  $I^2 < 50\%$ ), we reported a fixed-effect model.

### Statistics

The results of continuous outcomes were analyzed using mean difference (MD), with 95% confidence intervals (CI). The results of dichotomous outcomes were analyzed using odds ratios (OR) with 95% CI. We did not perform subgroup analyses since there were not sufficient trials with enough meaningful data.

## Results

### Search results

A total of 621 articles were identified for review; 535 records remained after de-duplication. The initial screening excluded 517 studies, leaving a total of 18 references for full text assessment. Finally, 14 articles met the inclusion criteria for our meta-analysis (Fig 1).

### Study characteristics

The characteristics of included studies are summarized in Table 1. A total of 1037 participants from 14 trials were included. Sample sizes ranged from 10 to 323 participants. The dosage of G-CSF administration varied according to each study, and the duration of treatment was 3, 5, or 7 days. Control groups were treated with placebo or conventional management. The length of follow up ranged from 14 days to 12 months. Included trials were conducted in China, Germany, Japan, Russia, India, and British.

### Risk of bias in included studies

In summary, the overall risk of bias among the 14 studies was low (S1 and S2 Figs). Regarding the methods of randomization used, 12 studies were randomized using computer-generated random numbers, randomization tables, an interactive web response system, or a central

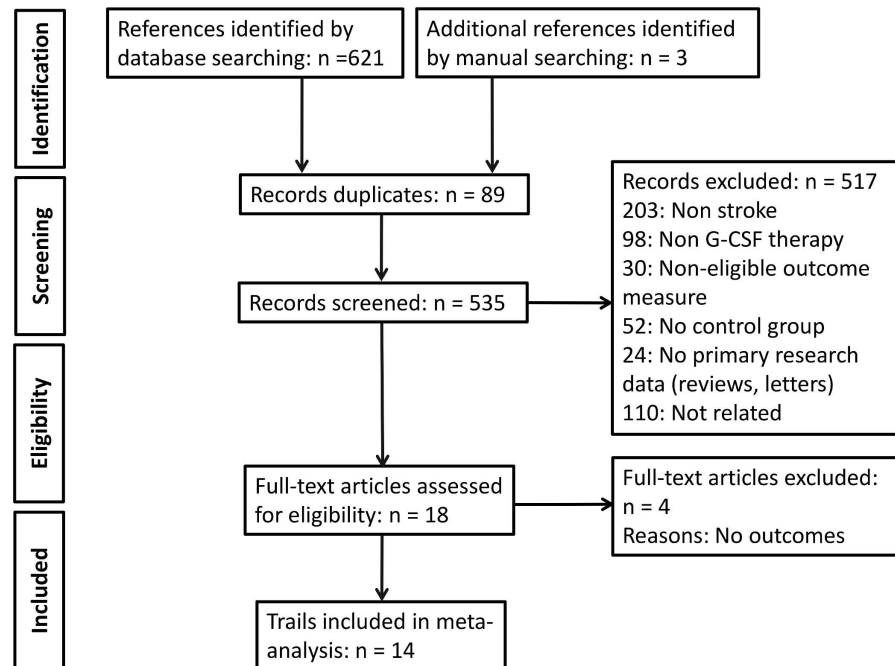

**Fig 1. Study flow diagram.**

<https://doi.org/10.1371/journal.pone.0175774.g001>

randomization/allocation system; 2 studies were randomized using opaque envelopes. With regard to allocation, 7 trials provided adequate allocation concealment. For blinding, 5 studies were double-blinded and 1 study was open-label. In 9 studies, the blinding of outcome assessors was adequate. In 2 studies, 10% and 20% of participants were lost due to follow up, respectively. No selective reporting was identified, but it was also difficult to rule out the possibility of selective reporting in most of the trials. As for other bias, investigators in 2 trails held a patent using G-CSF for the treatment of stroke.

## Intervention effects

**Mortality.** Mortality was reported for 519 treated subjects and 444 placebo subjects in 14 studies. In 6 studies, no deaths were reported. Overall, the rate of mortality did not differ between groups (odd ratio [OR], 1.23; 95% confidence interval [CI], 0.76–1.97;  $p = 0.40$ ) (Fig 2). No statistical heterogeneity was observed.

**SAEs.** SAEs were reported for 576 participants in 7 studies. The incidence of SAEs was significantly different between groups (OR, 1.11; 95% CI, 0.77–1.61;  $p = 0.57$ ) (Fig 3).

**NIHSS scores.** NIHSS scores were reported over a follow up period exceeding 3 months for 563 participants in 7 trials. At 3 months (90 days) follow up, NIHSS scores were not significantly different between groups (mean difference [MD], -0.16; 95% CI, -1.02–0.70;  $p = 0.72$ ) (Fig 4).

**BI scores.** BI scores were reported over a follow up period exceeding 3 months for 171 participants in 6 trials. At 3 months (90 days) follow up, BI scores were lower in the G-CSF treatment group than the control group (MD, 8.65; 95% CI, 0.98–16.32;  $p = 0.03$ ) (Fig 5).

**Leukocyte counts.** Leukocyte counts were reported for 660 patients in 10 trials. A significant increase in leukocyte count was identified in the G-CSF treatment group relative to the control group (MD, 30.67; 95% CI, 27.58–33.77;  $p < 1 \times 10^{-5}$ ) (Fig 6).

**Table 1. Characteristics of included studies.**

| Author and year of publication | Country        | Subjects (Interv., Ctrl.) | Age (Interv., Ctrl., years) | Method of administration                  | Dtime     | Stroke type           | Follow up period | Outcomemeasures |
|--------------------------------|----------------|---------------------------|-----------------------------|-------------------------------------------|-----------|-----------------------|------------------|-----------------|
| Ge 2005[13]                    | China          | 12; 13                    | ___; ___                    | Subcutaneous 5 µg/kg/d, 7d                | <7 d      | Acute ischemic stroke | 6 mo             | MESSS, BI       |
| Li 2005[14]                    | China          | 36; 35                    | ___; ___                    | Subcutaneous 300 µg/d, 5d                 | Non-state | Acute stroke          | 3 mo             | BI              |
| Zhang 2006[15]                 | China          | 25; 25                    | 60.5±5.9; 62.1±6.4          | Subcutaneous 2 µg/kg/d, 5d                | 1 week    | Acute stroke          | 20d              | NIHSS           |
| Sprigg 2006[16]                | British        | 24; 12                    | 76±9; 74±8                  | Subcutaneous 1, 3, or 10 µg/kg/d, 1 or 5d | 7–10 d    | Ischemic stroke       | 3 mo             | SNSS, BI, mRS   |
| Shyu 2006[5]                   | Taiwan (China) | 7; 3                      | 64.0±10.5; 69.0±1.5         | Subcutaneous 15 µg/kg/d, 5d               | 7 d       | Acute ischemic stroke | 12 mo            | NIHSS, BI       |
| Schäbitz 2010[17]              | Germany        | 30; 14                    | 71.1±11.4; 68.4±14.4        | Intravenous 30,90, 135, or 180 µg/kg, 3 d | 12 h      | Acute ischemic stroke | 90 d             | NIHSS, BI, mRS  |
| Xin 2011[18]                   | China          | 40; 40                    | 55±10; 56±10                | Intravenous 300 µg/d, 5d                  | <3 d      | Acute stroke          | 14 d             | BI              |
| England 2011[19]               | British        | 40; 20                    | 71.1±12.9; 72.3±9.6         | Subcutaneous 10 µg/kg/d, 5d               | 3–30 d    | Subacute stroke       | 3 mo             | NIHSS           |
| Alasheev 2011[20]              | Russia         | 10; 10                    | 50(46–57); 54(45–57)        | Subcutaneous 10 µg/kg/d, 5d               | ≤48 h     | Acute ischemic stroke | 3–6 mo           | NIHSS, BI       |
| Prasad 2011[21]                | India          | 5; 5                      | ___; ___                    | Subcutaneous 10 µg/kg/d, 5d               | 5 d       | Acute ischemic stroke | 6 mo             | NIHSS, BI, mRS  |
| Zhou 2013[22]                  | China          | 40; 42                    | 63(9); 64.5(7)              | Subcutaneous 600 µg/d, 5d                 | <7 d      | Acute stroke          | 3 mo             | NIHSS, BI       |
| Ringelstein 2013 [23]          | Germany        | 161; 163                  | 69.3±0.9; 69.4±0.9          | Intravenous 135µg/kg, 72h                 | ≤9 h      | Acute ischemic stroke | 3 mo             | mRS, NIHSS      |
| Huang 2015[24]                 | China          | 50; 50                    | 63.3±11.7; 62.2±12.8        | Intravenous 300 µg/d, 5d                  | ≤48 h     | Acute ischemic stroke | 14d              | NIHSS, BI       |
| Atsushi 2016[25]               | Japan          | 39; 10                    | ___; 71±13                  | Intravenous 150 or 300 µg/d, 5d           | ≤24 h     | Acute ischemic stroke | 3 mo             | NIHSS           |

<https://doi.org/10.1371/journal.pone.0175774.t001>

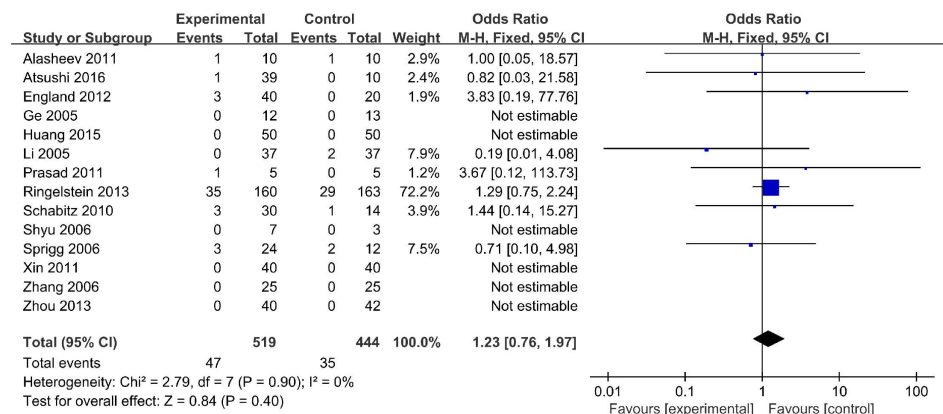

**Fig 2. Mortality.**

<https://doi.org/10.1371/journal.pone.0175774.g002>

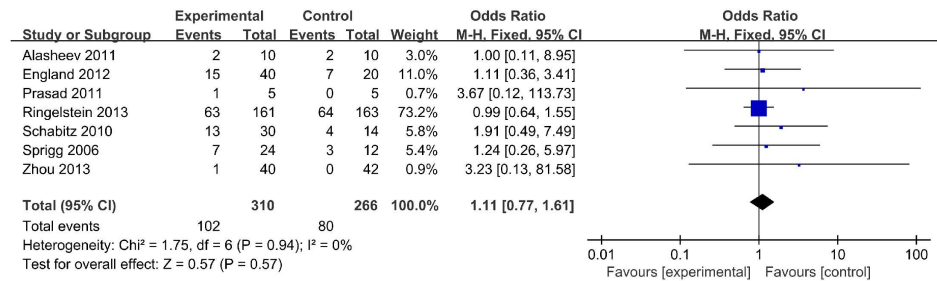

Fig 3. Severe adverse events.

<https://doi.org/10.1371/journal.pone.0175774.g003>

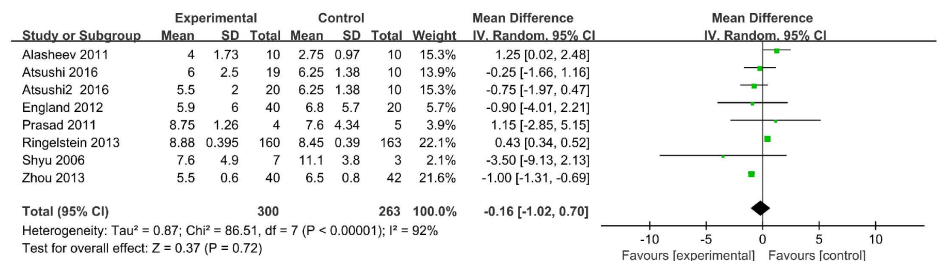

Fig 4. National Institutes of Health Stroke Scale scores.

<https://doi.org/10.1371/journal.pone.0175774.g004>

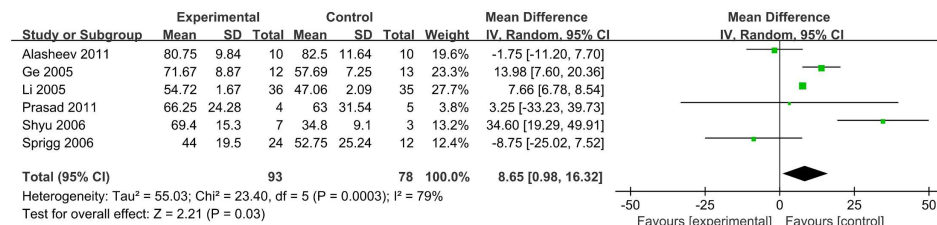

Fig 5. Barthel Index scores.

<https://doi.org/10.1371/journal.pone.0175774.g005>

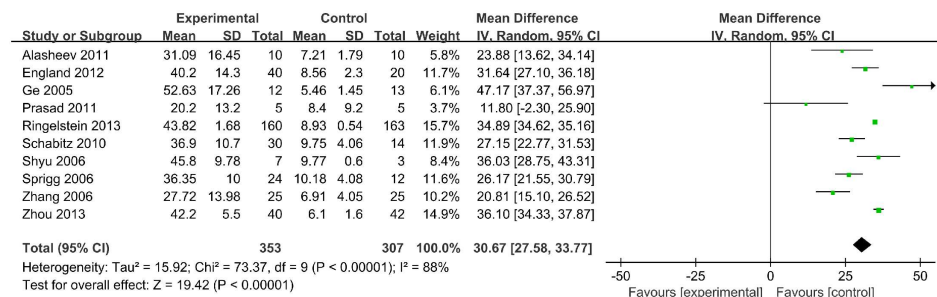

Fig 6. Leukocyte counts.

<https://doi.org/10.1371/journal.pone.0175774.g006>

## Discussion

### Summary of main results

While some clinical trials have reported the feasibility, safety, and efficacy of G-CSF therapy for stroke [5], the exact effects and utility of G-CSF are still disputed. In the present meta-analysis, we retrospectively analyzed 14 trials of G-CSF therapy in stroke and did not identify adequate evidence for the beneficial effects of this treatment modality in patients. Specifically, no favorable effects were noted on stroke outcomes including NIHSS score, the incidence of SAEs, and mortality in patients treated with G-CSF versus control or placebo-treated patients. Interestingly, a beneficial effect of G-CSF therapy was observed on BI score; however, considering the small sample sizes of the included studies, this finding was insufficient to support the efficacy of G-CSF therapy in stroke.

Much work has been conducted to inform the potential mechanisms G-CSF in stroke. One potential mechanism is the immune modulatory actions of G-CSF [26, 27]. Administration of G-CSF in humans produces anti-inflammatory effects by promoting anti-inflammatory mediators (i.e., sTNF-R and IL-1ra) and decreasing the release of pro-inflammatory mediators (i.e., TNF, IFN- $\gamma$ , and GM-CSF) [28]. Animal studies have confirmed the ability of G-CSF to decrease the release of pro-inflammatory cytokines (TNF, IFN- $\gamma$  and IL-6) and enhance the production of anti-inflammatory cytokines such as IL-4 [29]. Furthermore, G-CSF suppresses the inflammatory response of monocytes/macrophages (TNF, IL-8, IL-12) to toll-like receptor activation *in vitro* [26, 30–32]. Though several reviews have addressed the ability of G-CSF to reduce infarct volume and improve functional outcomes in animal models of stroke [33, 34], it has been difficult to translate these results to the clinical setting. G-CSF may have different neuroprotective efficacy in different phases and/or subtypes of stroke. For example, studies in acute ischemic stroke have shown greater improvements in neurologic function after more than 3 months of follow up studies [5, 13]. Future studies should investigate the utility of G-CSF in sub-acute versus chronic stroke, and in ischemic versus hemorrhagic stroke.

### Quality of evidence

The total number of participants included in the present meta-analysis was relatively small and thus inadequate for making definitive conclusions about the safety and efficacy of G-CSF therapy in stroke. Moreover, the follow up duration was less than 12 months in all studies and therefore provided an incomplete assessment of the safety of G-CSF therapy. The onset of G-CSF administration varied from 9 hours to 30 days after stroke onset, which may also have obscured the efficacy of G-CSF therapy. Three trials showed performance bias, and 5 trials did not report details about the blinding of participants and personnel. Though the overall data had a low risk of bias, the results of the current meta-analysis should be interpreted with caution.

### Literature context

At the time of this study, we identified 2 other meta-analyses that assessed the efficacy of G-CSF therapy in patients with stroke [10, 11]. The review by Fan included 10 studies with 711 patients and the other one included 8 trials involving 548 participants. Both reviews showed that G-CSF produced minor side effects but was safe overall, and indicated that G-CSF significantly increased leukocyte counts; these findings were similar to the results of our analysis. With regard to functional outcomes, the review by Fan et al. found significant improvements in NIHSS score in the G-CSF group versus the placebo group ( $P < 0.05$ ), whereas the review by Bath et al. only detected a non-significant reduction in early functional impairment. With

regard to NIHSS score, our study was in agreement with the latter report. However, the observed effect of G-CSF therapy on BI score in our study represents a novel finding. Considering that reviews with varied sample size had shown different results, we suggest that larger and more robustly designed trials of G-CSF in stroke are needed in the future.

## Conclusions

Evidence from 14 studies that met the inclusion criteria for this meta-analysis indicated that G-CSF treatment in a cumulative dosage range from 1–135  $\mu\text{g}/\text{kg}/\text{day}$  did not produce significant SAEs in stroke patients; however, the small numbers of participants included in each trial made it difficult to make definitive conclusions about the safety of G-CSF therapy in stroke patients, especially considering the observed effect on leukocyte count. Moreover, our results showed no effect of G-CSF therapy on NIHSS score or other outcomes but a positive effect on BI score relative to control. Larger RCTs are needed to evaluate the efficacy of G-CSF in stroke.

## Supporting information

**S1 Fig. Risk of bias graph.**

(TIF)

**S2 Fig. Risk of bias summary.**

(TIF)

**S1 File. Search strategies.**

(DOC)

**S2 File. PRISMA 2009 checklist.**

(DOC)

## Acknowledgments

We would like to thank Editage [<http://www.editage.cn>] for English language editing.

## Author Contributions

**Conceptualization:** XH YL.

**Data curation:** XH YL.

**Formal analysis:** XH YL SB LP BZ HL.

**Funding acquisition:** YL.

**Investigation:** XH YL.

**Methodology:** XH YL SB.

**Project administration:** XH YL.

**Resources:** XH YL.

**Software:** XH.

**Supervision:** YL HL.

**Validation:** LP BZ HL.



**Visualization:** XH YL SB HL.

**Writing – original draft:** XH SB.

**Writing – review & editing:** XH YL.

## References

1. Jüttler E, Unterberg A, Woitzik J, Bösel J, Amiri H, Sakowitz OW, et al. Memicraniectomy in older patients with extensive middle-cerebral-artery stroke. *N Engl J Med*. 2014; 370: 1091–1100. <https://doi.org/10.1056/NEJMoa1311367> PMID: 24645942
2. Welte K, Platzer E, Lu L, Gabrilove JL, Levi E, Mertelsmann R, et al. Purification and biochemical characterization of human pluripotent hematopoietic colony-stimulating factor. *Proc Natl Acad Sci USA*. 1985; 82: 1526–1530. PMID: 3871951
3. Demetri GD, Griffin JD. Granulocyte colony-stimulating factor and its receptor. *Blood*. 1991; 78: 2791–2808. PMID: 1720034
4. Mehta HM, Malandra M, Corey SJ. G-CSF and GM-CSF in neutropenia. *J Immunol*. 2015; 195: 1341–1349. <https://doi.org/10.4049/jimmunol.1500861> PMID: 26254266
5. Shyu WC, Lin SZ, Lee CC, Liu DD, Li H. Granulocyte colony-stimulating factor for acute ischemic stroke: a randomized controlled trial. *CMAJ*. 2006; 174: 927–933. <https://doi.org/10.1503/cmaj.051322> PMID: 16517764
6. Gorthi S, Nauwhar D, Gupta P, Hassan K. A randomized control trial of granulocyte colony stimulating factor (G-CSF) intervention in acute ischemic stroke to improve functional outcome. *Neurology*. 2014; 82: 10.
7. Solaroglu I, Cahill J, Tsubokawa T, Beskonakli E, Zhang JH. Granulocyte colony-stimulating factor protects the brain against experimental stroke via inhibition of apoptosis and inflammation. *Neurol Res*. 2009; 31:167–172. <https://doi.org/10.1179/174313209X393582> PMID: 19298757
8. Lee ST, Chu K, Jung KH, Ko SY, Kim EH, Sinn DI, et al. Granulocyte colony-stimulating factor enhances angiogenesis after focal cerebral ischemia. *Brain Res*. 2005; 1058: 120–128. <https://doi.org/10.1016/j.brainres.2005.07.076> PMID: 16150422
9. Schneider A, Krüger C, Steigleder T, Weber D, Pitzer C, Laage R, et al. The hematopoietic factor G-CSF is a neuronal ligand that counteracts programmed cell death and drives neurogenesis. *J Clin Invest*. 2005; 115:2083–2098. <https://doi.org/10.1172/JCI23559> PMID: 16007267
10. Fan ZZ, Cai HB, Ge ZM, Wang LQ, Zhang XD, Li L, et al. The efficacy and safety of granulocyte colony-stimulating factor for patients with stroke. *J Stroke Cerebrovasc Dis*. 2015; 24: 1701–1708.
11. Bath PM, Sprigg N, England T. Colony stimulating factors (including erythropoietin, granulocyte colony stimulating factor and analogues) for stroke. *Cochrane Database Syst Rev*. 2013; 6: CD005207.
12. Higgins JPT, Green S. *Cochrane Handbook for systematic reviews of interventions*. West Sussex: Cochrane Collaboration and John Wiley & Sons Ltd; 2008.
13. Zhaoli G, Runtao B, Manfu H, Lijie R. Clinical study of mobilized autogeneic bone marrow stem cells in treating acute ischemic stroke. *Stroke and Nervous Diseases*. 2005; 12:161–163.
14. Jing L, Lijie R, Manfu H, Yuhong L, Ting C, Hongye F, et al. Granulocyte-colony stimulating factor for acute cerebral infarction. *Cerebrovasc Dis Foreign Med Sci*. 2005; 13:106–109.
15. Zhang JJ, Deng M, Zhang Y, Sui W, Wang L, Sun A. A short-term assessment of recombinant human granulocyte stimulating factor (RHG-CSF) in treatment of acute cerebral infarction. *Cerebrovasc Dis*. 2006; 21:143.
16. Sprigg N, Bath PM, Zhao L, Willmot MR, Gray LJ, Walker MF, et al. Granulocyte-colony-stimulating factor mobilizes bone marrow stem cells in patients with subacute ischemic stroke: The Stem cell Trial of recovery EnhanceMent after Stroke (STEMS) pilot randomized, controlled trial. *Stroke*. 2006; 37:2979–2983. <https://doi.org/10.1161/01.STR.0000248763.49831.c3> PMID: 17082474
17. Schäbitz WR, Laage R, Vogt G, Koch W, Kollmar R, Schwab S, et al. AXIS: a trial of intravenous granulocyte colony-stimulating factor in acute ischemic stroke. *Stroke*. 2010; 41: 2545–2551. <https://doi.org/10.1161/STROKEAHA.110.579508> PMID: 20947859
18. Guo-dong X, Yue-ning B. Efficacy of Recombinant human granulocyte colony stimulating factor for the treatment of acute cerebral infarction of 40 cases. *Chin J Diffic and Compl Cas*. 2011; 10:54–56.
19. England TJ, Abaei M, Auer DP, Lowe J, Jones DR, Sare G, et al. Granulocyte-colony stimulating factor for mobilizing bone marrow stem cells in subacute stroke: the stem cell trial of recovery enhancement after stroke 2 randomized controlled trial. *Stroke*. 2012; 43: 405–411. <https://doi.org/10.1161/STROKEAHA.111.636449> PMID: 22198983

20. Alasheev AM, Belkin AA, Leiderman IN, Ivanov RA, Isakova TM. Granulocyte-colony-stimulating Factor for Acute Ischemic Stroke: A Randomized Controlled Trial (STEMTHER). *Transl Stroke Res*. 2011; 2:358–365. <https://doi.org/10.1007/s12975-011-0091-3> PMID: 24323654
21. Prasad K, Kumar A, Sahu JK, Srivastava MV, Mohanty S, Bhatia R, et al. Mobilization of stem cells using G-CSF for acute ischemic stroke: a randomized controlled, pilot study. *Stroke Res Treat*. 2011; 2011:283473. <https://doi.org/10.4061/2011/283473> PMID: 22007348
22. Yumiao Z, Jiong W, Xiaoli L, Yaguo L. Granulocyte colony-stimulating factors in acute ischemic stroke: a study of effect and safety. *Chinese General Practice*. 2013; 16: 4148–4151.
23. Ringelstein EB, Thijs V, Norrving B, Chamorro A, Aichner F, Grond M, et al. Granulocyte colony-stimulating factor in patients with acute ischemic stroke results of the Ax200 for ischemic stroke trial. *Stroke*. 2013; 44:2681–2687. <https://doi.org/10.1161/STROKEAHA.113.001531> PMID: 23963331
24. Mingou H. Efficacy of Recombinant human granulocyte colony stimulating factor for the treatment of acute cerebral infarction. *Chinese Journal of Practical Nervous Diseases*. 2015; 18: 126–127.
25. Mizuma A, Yamashita T, Kono S, Nakayama T, Baba Y, Itoh S, et al. Phase II trial of intravenous low-dose granulocyte colony-stimulating factor in acute ischemic stroke. *J Stroke Cerebrovasc Dis*. 2016; 25: 1451–1457. <https://doi.org/10.1016/j.jstrokecerebrovasdis.2016.01.022> PMID: 27017282
26. Martins A, Han J, Kim SO. The multifaceted effect of granulocyte colony-stimulating factor in immunomodulation and potential roles in intestinal immune homeostasis. *IUBMB Life*. 2010; 62:611–617. <https://doi.org/10.1002/iub.361> PMID: 20681025
27. Hamilton JA. Colony-stimulating factors in inflammation and autoimmunity. *Nat Rev Immunol*. 2008; 8:533–544. <https://doi.org/10.1038/nri2356> PMID: 18551128
28. Hartung T, Döche WD, Gantner F, Krieger G, Sauer A, Stevens P, et al. Effect of granulocyte colony-stimulating factor treatment on ex vivo blood cytokine response in human volunteers. *Blood*. 1995; 85:2482–2489. PMID: 7537116
29. Valente JF, Alexander JW, Li BG, Nodel JG, Custer DA, Ogle JD, et al. Effect of in vivo infusion of granulocyte colony-stimulating factor on immune function. *Shock*. 2002; 17:23–29. PMID: 11795665
30. Boneberg EM, Hareng L, Gantner F, Wendel A, Hartung T. Human monocytes express functional receptors for granulocyte colony-stimulating factor that mediate suppression of monokines and interferon-gamma. *Blood*. 2000; 95:270–276. PMID: 10607712
31. Nishiki S, Hato F, Kamata N, Sakamoto E, Hasegawa T, Kimura-Eto A, et al. Selective activation of STAT3 in human monocytes stimulated by G-CSF: implication in inhibition of LPS-induced TNF-alpha production. *Am J Physiol Cell Physiol*. 2004; 286: C1302–C1311. <https://doi.org/10.1152/ajpcell.00387.2003> PMID: 14736711
32. Kim SO, Sheikh HI, Ha SD, Martins A, Reid G. G-CSF-mediated inhibition of JNK is a key mechanism for lactobacillus rhamnosus-induced suppression of TNF production in macrophages. *Cell Microbiol*. 2006; 8: 1958–1971. <https://doi.org/10.1111/j.1462-5822.2006.00763.x> PMID: 16889627
33. Minnerup J, Heidrich J, Wellmann J, Rogalewski A, Schneider A, Schäbitz WR. Meta-analysis of the efficacy of granulocyte colony-stimulating factor in animal models of focal cerebral ischemia. *Stroke*. 2008; 39: 1855–1861. <https://doi.org/10.1161/STROKEAHA.107.506816> PMID: 18403735
34. England TJ, Gibson CL, Bath PM. Granulocyte colony-stimulating factor in experimental stroke and its effects on infarct size and functional outcome: a systematic review. *Brain Res Rev*. 2009; 62: 71–82. <https://doi.org/10.1016/j.brainresrev.2009.09.002> PMID: 19751764
